# Does Ecophysiology Determine Invasion Success? A Comparison between the Invasive Boatman *Trichocorixa verticalis verticalis* and the Native *Sigara lateralis* (Hemiptera, Corixidae) in South-West Spain

Cristina Coccia<sup>1\*</sup>, Piero Calosi<sup>2</sup>, Luz Boyero<sup>1</sup>, Andy J. Green<sup>1</sup>, David T. Bilton<sup>2</sup>

**1** Department of Wetland Ecology, Estación Biológica de Doñana-EBD (CSIC), Seville, Spain, **2** Marine Biology and Ecology Research Centre, University of Plymouth, Plymouth, United Kingdom

## Abstract

**Background:** *Trichocorixa verticalis verticalis*, a native of North America, is the only alien corixid identified in Europe. First detected in 1997 in southern Portugal, it has spread into south-west Spain including Doñana National Park. Its impact on native taxa in the same area is unclear, but it is the dominant species in several permanent, saline wetlands.

**Methodology/Principal Findings:** We investigated whether the ecophysiology of this alien species favours its spread in the Iberian Peninsula and its relative success in saline areas. We compared physiological responses to heating (Critical Thermal maximum), cooling (Critical Thermal minimum) and freezing (Super Cooling Point) in the native *Sigara lateralis* and introduced *T. v. verticalis* acclimated to different temperatures and salinities. The larger *S. lateralis* generally outperformed *T. v. verticalis* and appeared to possess a broader thermal tolerance range. In both taxa,  $CT_{max}$  was highest in animals exposed to a combination of high conductivities and relatively low acclimation temperatures. However,  $CT_{max}$  was generally higher in *T. v. verticalis* and lower in *S. lateralis* when acclimated at higher temperatures.  $CT_{min}$  were lower (greater tolerance to cold) after acclimation to high conductivities in *T. v. verticalis*, and following acclimation to low conductivities in *S. lateralis*. Both acclimation temperature and conductivity influenced corixids' freezing tolerance; however, only in *T. v. verticalis* did SCP decrease after exposure to both high temperature and conductivity. *T. v. verticalis* showed a higher range of mean responses over all treatments.

**Conclusions:** Whilst the native *S. lateralis* may have a broader thermal range, the alien species performs particularly well at higher salinities and temperatures and this ability may facilitate its invasion in Mediterranean areas. The greater plasticity of *T. v. verticalis* may further facilitate its spread in the future, as it may be more able to respond to climate shifts than the native species.

**Citation:** Coccia C, Calosi P, Boyero L, Green AJ, Bilton DT (2013) Does Ecophysiology Determine Invasion Success? A Comparison between the Invasive Boatman *Trichocorixa verticalis verticalis* and the Native *Sigara lateralis* (Hemiptera, Corixidae) in South-West Spain. PLoS ONE 8(5): e63105. doi:10.1371/journal.pone.0063105

**Editor:** Jordi Moya-Larano, Estacion Experimental de Zonas Áridas (CSIC), Spain

**Received:** November 13, 2012; **Accepted:** March 28, 2013; **Published:** May 17, 2013

**Copyright:** © 2013 Coccia et al. This is an open-access article distributed under the terms of the Creative Commons Attribution License, which permits unrestricted use, distribution, and reproduction in any medium, provided the original author and source are credited.

**Funding:** This research was funded by project P10-RNM-6262 financed by the Consejería de Innovación, Ciencia y Empresa, Junta de Andalucía (<http://www.juntadeandalucia.es/index.html>) and JAE predoctoral grant from The Spanish National Research Council (CSIC) (<http://www.csic.es/web/guest/home;jsessionid=DDBAF717403F7C9FB3DF1BD89EF624B3>). This work was undertaken while P.C. had a Research Council UK Research Fellowship at Plymouth University (<http://www.rcuk.ac.uk/Pages/Home.aspx>). The funders had no role in study design, data collection and analysis, decision to publish, or preparation of the manuscript.

**Competing Interests:** The authors have declared that no competing interests exist.

\* E-mail: coccia@ebd.csic.es

## Introduction

Freshwater habitats occupy less than 1% of the world's surface, but hold more than 7% of described species [1], with extensive local endemism [2,3]. At the same time, however, inland water ecosystems and biological communities are affected by increasing numbers of alien species [4] and are amongst the most threatened in the world [1]. According to the DAISIE database, there are 296 invertebrate alien species in European inland waters [5]. However, the consequences of invasive invertebrate species for faunal composition, community structure and ecosystem functioning in freshwater systems are largely unknown, with the exception of a

handful of taxa such as the red swamp crayfish *Procambarus clarkii* [6] and the zebra mussel *Dreissena polymorpha* [7].

Whilst some taxonomic groups (e.g. bivalves, crustaceans and gastropods) are well represented in alien invertebrate species lists, insects are highly under-represented, despite them dominating the world's freshwater fauna [8]. A recent addition to these lists is the water boatman *Trichocorixa verticalis verticalis* (Fieber, 1851) (Hemiptera, Corixidae), native to North America, but now occurring in temperate zones in other parts of the world such as South Africa, Iberia and Morocco [9–11]. In Europe, *T. v. verticalis* represents the only established alien waterbug [12]. In the Iberian Peninsula it was first recorded in 1997 in the Algarve in Portugal [13]. It is

now successfully established and continues to spread, but is so far restricted to areas along the Atlantic coast [13] and in the Guadalquivir Estuary and surrounding parts of SW Spain [14,15]. It is predicted to spread widely across Europe and the Mediterranean region in the future [16]

*T. v. verticalis* is now the dominant breeding corixid at several sites in and around Doñana National Park on the Guadalquivir Estuary [14,15]. Part of its success appears to be related to its ability to live in hypersaline environments [17], and to colonize different kinds of habitats, including brackish and saline waterbodies [18]. This ability may enhance the competitive advantage of *T. v. verticalis* over other corixids in the face of global change. During the twentieth century, the wetlands in southern Spain and the rest of the Mediterranean region have become increasingly prone to development and extraction of fresh water [19,20] and these factors, together with projected climate-induced changes in hydrology, increase salt concentrations in remaining waterbodies [21].

If native species are unable to respond to extreme conditions, either physiologically [22–25] or behaviourally [26,27], they are likely to be excluded through interspecific competition with more tolerant species [28,29]. Field data on the distribution of *T. v. verticalis* suggest that its physiological tolerance of salinity may be at least partly responsible for its competitive advantage over native corixids in the Doñana area [15]. Moreover, the effects of salinity and temperature on insect physiological tolerance can be synergistic or additive. Sánchez-Fernández *et al.* [30] for example, recently demonstrated how the interaction of these two environmental factors influences the thermal biology of adult *Nebrioporus* diving beetles, where cold tolerance increases following exposure to high salinities and low temperatures.

In this experimental study, we subjected *T. v. verticalis* and the native Palaearctic corixid *Sigara lateralis* (Leach, 1817) [31] to different combinations of temperature and salinity and compared several indicators of upper and lower thermal sensitivity of individuals of both species acclimated to different conditions. These two species are sympatric in southern Iberia, and frequently occur together in the same ponds, although *T. v. verticalis* is becoming the dominant corixid in some areas previously occupied by *S. lateralis* [14]. We specifically examined their critical thermal maximum (as a proxy for upper thermal limits), chill coma (as a proxy for lower thermal limits) [32,33], and cold hardiness (supercooling point, often used as a measure of tolerance to low temperatures) [34,35]. Differences in thermal tolerance and plasticity between native and invasive species can be used as predictors of their ability to persist, increase or decline in response to climate change. We explore whether exposure to different acclimation salinities and temperatures influence the thermal tolerance of the native and invasive species in an interactive manner, and examine the implications these have for the spread of *T. v. verticalis*.

## Materials and Methods

### Animal collection and maintenance

Adults of *Trichocorixa verticalis verticalis* and *Sigara lateralis* were collected during July and August 2010 using a D-framed pond net (500  $\mu\text{m}$  mesh; 16  $\times$  16 cm) from different sites in Doñana and the Odiel marshes (SW Spain). Permits for sampling in Doñana and Odiel were provided by the Consejería de Medio Ambiente, Junta de Andalucía. Conductivity of sampling sites ranged from 60  $\text{mS cm}^{-1}$  (Odiel marshes) to 1.15  $\text{mS cm}^{-1}$  (Doñana National Park) (See Table 1). Sites were chosen based on preliminary observations of corixid presence ([14], authors' unpublished data).

After collection, corixids were transported to the laboratory inside plastic containers filled with damp aquatic vegetation and kept within thermally insulated polystyrene boxes in order to minimize thermal fluctuations and extremes as much as possible. In the laboratory, individuals were maintained in aquaria containing water close to the original conductivity, before being transferred to holding aquaria with water at conductivity 18  $\text{mS cm}^{-1}$ . When the original conductivity was  $>35 \text{ mS cm}^{-1}$ , to avoid acute exposure to experimental conditions, individuals were first maintained at 25–30  $\text{mS cm}^{-1}$ , before being transferred to 18  $\text{mS cm}^{-1}$  (see Table 1). Aquaria were provided with sand and vegetation, and corixids were fed *ad libitum* with frozen chironomid larvae. Individuals were maintained on a natural photoperiod regime for 24 h before they were subjected to acclimation conditions, with a 12 h:12 h D:L regime.

### Experimental setup and acclimation

Individuals were transferred to 3 L aquaria (with a maximum of 13 ind. of the same species in each aquarium) at 4 different conductivities: 1, 4, 12 and 18  $\text{mS cm}^{-1}$ , which corresponded to salinities of 0, 2.1, 6.8 and 10.6 ppt. Aquaria were kept for 72 h in either a climatic chamber set at 10 or 15°C or a water bath set at 25°C. Temperatures and salinities were chosen to simulate a range of conditions present at waterbodies where both species are found together [14,36]. Whilst these conductivities do not span the entire range occupied by *T. v. verticalis* in the field (see above) they were chosen since preliminary experiments demonstrated that they were non-lethal in both taxa studied, allowing direct comparison of their responses to be conducted across a wide conductivity range. Waters of different conductivity were prepared by dissolving an appropriate quantity of salt (Instant Ocean, Aquarium Systems, Sarrebourg, France) in aerated artificial pond water, that consists of a solution of salts dissolved in double-distilled water, prepared according to a standardized protocol [37]. During the experiment we monitored water temperature and conductivity at 12 h intervals using a handheld multimeter (YSI 85, Yellow Springs, USA). Conductivity fluctuations, due to evaporation and/or differences in solubility, were corrected by dissolving small quantities of Instant Ocean or adding artificial pond water to aquaria. Aquaria were sealed with cling-film to reduce evaporation and to prevent individuals from escaping, whilst aeration was continuously provided. No food was provided 24 h prior to thermal tolerance limits being determined.

Following the exposure period, 10 individuals of each species were randomly removed from each treatment and further subdivided into two equal-sized groups: one sub-group was used to measure critical thermal maximum ( $\text{CT}_{\text{max}}$ ) and the other to measure critical thermal minimum ( $\text{CT}_{\text{min}}$ ). The estimation of supercooling point (SCP) was undertaken in separate trials approx. 15 d after the determination of thermal limits, using the same procedure. After experiments, individuals were sexed using a stereo microscope and weighed to the nearest 0.001 g using a Sartorius 1204 MP2 balance (Sartorius Ltd, U.K.).

Thermal tolerance and supercooling point experiments were carried out in air given the impossibility to estimate freeze tolerance in water. This procedure provides an indication of the ability of a species to perform better than others at high or low temperatures in water as well as air [22–24,30].

### Thermal tolerance experiments

Thermal tolerance tests commenced at the temperature at which individuals had been acclimated (see [38] for methodological details). A total of 240 individuals were used: 120 *S. lateralis* and 120 *T. v. verticalis*. Individuals were removed from their

**Table 1.** Collection sites in SW Spain, original conductivities and maintenance water conditions in the laboratory.

| Sampling date | Arrival date | Sites               | Original conductivity     | Laboratory conductivity  | Species       |
|---------------|--------------|---------------------|---------------------------|--------------------------|---------------|
| 21/07/10      | 23/07/10     | Veta la Palma (VLP) | 11.59 mS cm <sup>-1</sup> | 12 mS cm <sup>-1</sup>   | <i>Tvv+Sl</i> |
| 29/07/10      | 02/08/10     | Odiel Marshes       | 60 mS cm <sup>-1</sup>    | 30 mS cm <sup>-1</sup>   | <i>Tvv</i>    |
| 30/07/10      | 02/08/10     | VLP-EBD             | 14 mS cm <sup>-1</sup>    | 14 mS cm <sup>-1</sup>   | <i>Tvv</i>    |
| 30/07/10      | 02/08/10     | FAO                 | 2.8 mS cm <sup>-1</sup>   | 2.6 mS cm <sup>-1</sup>  | <i>Tvv+Sl</i> |
| 30/07/10      | 02/08/10     | Caracoles           | 41 mS cm <sup>-1</sup>    | 25 mS cm <sup>-1</sup>   | <i>Tvv+Sl</i> |
| 19/08/10      | 20/08/10     | FAO                 | 1153 μS cm <sup>-1</sup>  | 1 mS cm <sup>-1</sup>    | <i>Tvv+Sl</i> |
| 19/08/10      | 20/08/10     | VLP-EBD             | 36.5 mS cm <sup>-1</sup>  | 25 mS cm <sup>-1</sup>   | <i>Tvv</i>    |
| 31/08/10      | 01/09/10     | FAO                 | 1.32 mS cm <sup>-1</sup>  | 1.32 mS cm <sup>-1</sup> | <i>Tvv+Sl</i> |
| 31/08/10      | 01/09/10     | Caño Guadamar       | 6.76 mS cm <sup>-1</sup>  | 6 mS cm <sup>-1</sup>    | <i>Tvv+Sl</i> |

All sites are in Doñana except the Odiel Marshes (See [14,15] for details). VLP-EBD are individuals reared in mesocosms at the EBD (Estación Biológica de Doñana-CSIC) but originating from Veta la Palma. *Tvv* = *Trichocorixa v. verticalis*; *Sl* = *Sigara lateralis*.  
doi:10.1371/journal.pone.0063105.t001

acclimation aquaria, quickly but carefully blotted on absorbent paper, and placed into a clean and dry well of a plastic multiwell culture plate. For CT<sub>min</sub>, specimens were placed individually into a generic 24-well plastic culture plate (Corning Ltd, Sunderland, UK), while for CT<sub>max</sub> a modified plate was used with deeper wells to avoid escape during heating. In both cases, external bases were painted with white Tipp-Ex to allow easy visualization of temperature related responses. Plates were immersed in the water bath until only the upper edges (1–2 mm) were exposed, and affixed to the side of the bath with adhesive tape to prevent movements and thus water entering experimental wells. To further avoid escape, well plates were covered with a plastic lid between additions of individuals. Once the experiment started, lids were removed to allow full aeration and avoid the build-up of water vapour, which might have affected the thermal tolerance of individuals [39]. A maximum of 5 individuals were tested at any one time.

Thermal tolerance tests relied on a dynamic method, which involves increasing or decreasing test temperatures via a ramping program ( $\pm 1^\circ\text{C min}$ ) until the end-point (see below) was observed. A rapid ramping rate was favoured as it allows observed responses to be related to the effect of different acclimations, and minimizes other undesired effects that may occur during slower ramping on thermal limits (see [40]). Experiments were performed with a Grant R5 water bath (12 l capacity) and a GP200 thermostatic controller (Grant Instruments Ltd., Cambridgeshire, England) connected to a computer. Grant Labwise software was used to construct and control temperature programs. The actual temperature within each well was measured directly using a calibrated digital thermometer (Omega\_HH11; Omega Engineering Inc., Stamford, CT, USA) equipped with an Omega<sup>®</sup> 'precision fine wire thermocouple' (type T – dia./ga. 0.08/0.13 Teflon). Distilled water and 70% ethylene glycol solutions were used as fluids inside the water bath to determine CT<sub>max</sub> and CT<sub>min</sub>/SCP respectively.

CT<sub>max</sub> and CT<sub>min</sub> were defined using individual end-points represented by death (lethal point) at high temperatures, and chill coma (sub-lethal point) at low temperatures. Whereas death was readily identifiable in CT<sub>max</sub> experiments (individuals never revived after cessation of movement), defining lower lethal limits was more difficult. At low temperatures, individuals exhibited total paralysis and were apparently dead (chill coma), but they would revive and recover full or partial locomotory abilities shortly after the end of the exposure period. As already documented for other insects [41,24], both lethal limits and sublethal end-points (e.g.

paralysis) provide an accurate picture of insect thermal biology. Consequently, we defined CT<sub>min</sub> as the temperature at which individuals were paralysed, as the few corixids which recovered from the treatment were severely impaired in their locomotory ability and died shortly afterwards.

### Supercooling point experiment

The SCP is the temperature of spontaneous freezing at which a biological solution or a whole organism freezes when cooled below its equilibrium freezing temperature [42,43]. During this experiment, the temperature at which individuals froze (SCP) was determined with a Campbell Scientific CR1000 datalogger equipped with an Omega 'precision fine wire thermocouple' (type T 1 mm long, 0.08 or 0.13 mm diameter) interfaced to a computer. Data were recorded and stored at 1 s intervals using Campbell Scientific PC400 software. Tests were carried out using a Grant R5 water bath (12 l capacity) and a GP200 thermostatic controller (Grant Instruments Ltd., Cambridgeshire, England) connected to a computer. Grant Labwise software was used to construct and control temperature programs.

A total of 115 individuals were tested: 60 *S. lateralis* and 55 *T. v. verticalis*. Individuals were removed from their exposure aquaria, quickly but carefully blotted on absorbent paper, and attached individually by the dorsum to an acetate disk with cyanoacrylic glue (Loctite, Henkel Ltd, Hempstead, UK). Individuals were introduced, one per well, into a 12-well plastic culture plate. A maximum of 5 animals were run concurrently in each experiment. The SCP was measured by supporting the thermocouple vertically on the insect's abdomen. Thermocouple movement was avoided by fixing individuals to the cell walls with BlueTack. Once ready, the individuals were transferred to the tank, and plates were covered with acetate lids to avoid thermal oscillations during the experiment. Individuals were cooled with a cooling ramp program ( $\pm 1^\circ\text{C min}^{-1}$ ), starting from the temperature at which individuals had been acclimated. The SCP of each individual was recorded as the lowest temperature reached before the start of the exothermic reaction caused by the latent heat of freezing of the animal's body fluids [44,45]. Owing to a shortage of individuals, we were unable to test the SCP on individuals of *T. v. verticalis* exposed to 25°C and 18 mS cm<sup>-1</sup>.

### Statistical analyses

In order to assess the effect of exposure to different temperatures and conductivities on the thermal biology of *S. lateralis* and *T. v.*

*verticalis*, we examined differences in  $CT_{max}$ ,  $CT_{min}$  and SCP with general linear models on untransformed data; with acclimation temperature (10, 15 or 25°C), acclimation conductivity (1, 4, 12 and 18  $mS\ cm^{-1}$ ), and species (*T. v. verticalis* or *S. lateralis*) as fixed factors, and sex (male or female) as a random factor. With the exception of  $CT_{max}$ , sex did not have a significant effect and was excluded from further analyses. Variances met assumptions for homoscedasticity (Levene's test,  $P>0.05$ ), and data met the assumption of normality (Shapiro–Wilks test,  $P>0.05$ ) for both  $CT_{min}$  and SCP as untransformed data, but not for  $CT_{max}$ , even after  $\log_{10}$  transformation. However, given our sample sizes, models employed were robust to deviations from normality [46,47] and examination of residual plots for all data revealed satisfactory patterns. Model selection started by incorporating all predictors and the interactions between factors. Then, non-significant interactions were removed in a hierarchical, stepwise manner until a significant effect or interaction was found.

Body weight was not included in the overall model because it was not measured in all individuals of *T. v. verticalis*. We thus used a second model for only *S. lateralis* with the above factors together with body weight as a covariate. With the exception of  $CT_{max}$ , body weight did not have a significant effect on *S. lateralis* thermal limits ( $P>0.05$  for both  $CT_{min}$  and SCP), and was thus excluded from further analyses.

Finally, Bonferroni-corrected Estimate Marginal Means post-hoc tests were used for pairwise comparisons when any single factor or interaction was significant. All analyses were performed using SPSS version 17.0.

## Results

### Critical thermal maximum

For both species, mean  $CT_{max}$  reached its maximum when individuals were acclimated at the lowest temperature (10°C) and the highest conductivity (18  $mS\ cm^{-1}$ ) (Figure 1), whilst minimum  $CT_{max}$  were recorded at 10°C and 1  $mS\ cm^{-1}$  for *T. v. verticalis* and 25°C and 18  $mS\ cm^{-1}$  for *S. lateralis*.

In terms of their  $CT_{max}$ , *S. lateralis* and *T. v. verticalis* responded differently to acclimation at different temperatures (temperature  $\times$  species interaction  $P<0.001$ ; Figure 1, Table 2 - Bonferroni tests maximum  $P=0.035$ ; Table S1). Mean  $CT_{max}$  was also significantly influenced by the interaction between temperature and conductivity ( $P<0.001$ ; Figure S1, Table 2 - Bonferroni tests maximum  $P=0.049$ ; Table S1). Sex also had a strong influence ( $P<0.03$ ; Table 2) on  $CT_{max}$  in both species' heat tolerance,  $CT_{max}$  being higher on average in females than males (Bonferroni tests maximum  $p=0.030$ ; Table S1).

Overall,  $CT_{max}$  was significantly higher in *S. lateralis* than in *T. v. verticalis* (Figure S2) at 10°C and 15°C ( $P<0.05$ ) but not at 25°C ( $P>0.05$ ). However, post-hoc comparisons showed that conductivity had a marginal influence on  $CT_{max}$  when animals were acclimated at higher temperatures. In contrast,  $CT_{max}$  was significantly lower for *S. lateralis* at 25°C than at other temperatures (Figure 1; Table S1).

*S. lateralis* was larger on average than *T. v. verticalis*, with mean ( $\pm$  SE) body weights of  $5.35\pm 1.28$  mg and  $3.46\pm 0.73$  mg, respectively. When *S. lateralis* was analysed separately with body weight as an additional covariate (Table 3),  $CT_{max}$  increased significantly with body weight (Pearson correlation  $R=0.537$ ,  $P<0.001$ ) but sex no longer had a significant effect. Hence the effect of sex on  $CT_{max}$  seems to be a direct consequence of the lower body weight of males. Conductivity was the only other variable retaining a significant partial effect on  $CT_{max}$  once body weight was controlled for.

### Critical thermal minimum

Minimum  $CT_{min}$  were recorded at 10°C and 4  $mS\ cm^{-1}$  for *S. lateralis* and 15°C and 12  $mS\ cm^{-1}$  for *T. v. verticalis* (Figure 1). Maximum  $CT_{min}$  were recorded at 25°C and 18  $mS\ cm^{-1}$  for *S. lateralis* and at 10°C and 4  $mS\ cm^{-1}$  for *T. v. verticalis*. Mean lower thermal limit was significantly influenced by the interaction between species and conductivity ( $P<0.001$ ; Table 4 - Bonferroni tests maximum  $P=0.006$ ; Table S2). Mean  $CT_{min}$  also differed significantly between species ( $P<0.001$ ) with *S. lateralis* showing a higher tolerance to cold than *T. v. verticalis* (Bonferroni tests maximum  $P<0.001$ ; Figure S2; Table S2). Acclimation temperature was not significantly related to mean  $CT_{min}$  in either species.

$CT_{min}$  was lower for *S. lateralis* (i.e., this species showed a greater tolerance to low temperatures) at both 1 and 4  $mS\ cm^{-1}$ . For *S. lateralis*,  $CT_{min}$  increased significantly as conductivity increased from 4 to 18  $mS\ cm^{-1}$ . In contrast,  $CT_{min}$  for *T. v. verticalis* decreased significantly as conductivity increased from 4 to 12  $mS\ cm^{-1}$  (Table S2).

### Supercooling point

The minimum SCP for *S. lateralis* occurred when acclimated at 10°C and 12  $mS\ cm^{-1}$ , whilst the maximum for this species occurred when acclimated at 25°C and 12  $mS\ cm^{-1}$  (Figure 1). For *T. v. verticalis*, minimum and maximum SCP occurred when acclimated at 25°C and 1  $mS\ cm^{-1}$  and 15°C and 4  $mS\ cm^{-1}$ , respectively (Figure 1). Mean SCPs for *S. lateralis* and *T. v. verticalis* were influenced by acclimation at different temperatures (temperature  $\times$  species interactions  $P<0.001$ ; Table 5 - Bonferroni tests maximum  $P=0.014$ ; Table S3) and conductivities (conductivity  $\times$  species interaction  $P<0.001$ ; Table 5 - Bonferroni tests maximum  $P=0.026$ ; Table S3). For both species, freezing point was significantly influenced by both conductivity ( $P=0.041$ ; Table 5; Bonferroni tests maximum  $P=0.044$ ; Table S3) and acclimation temperature ( $P=0.003$ ; Table 5; Bonferroni tests maximum  $P=0.002$ ; Table S3). Mean SCPs also differed strongly between species ( $P=0.001$ ; Table S3), being lower on average for *S. lateralis* (Bonferroni tests  $P=0.001$ ; Table S3).

Overall, *S. lateralis* had a significantly lower SCP (i.e. greater tolerance to freezing) than *T. v. verticalis*. Such a significant effect was recorded at acclimation temperatures of 10 and 15°C, but was reversed at 25°C (Figure S2). At conductivities of 4 and 12  $mS\ cm^{-1}$ , *S. lateralis* had a significantly lower SCP than the alien corixid (Figure S2). For *T. v. verticalis* only, post-hoc tests showed that SCP varied significantly both with temperature and conductivity, decreasing as temperature increased to 25°C, and as conductivity increased to 18  $mS\ cm^{-1}$  (Table S3).

## Discussion

*T. v. verticalis* and *S. lateralis* differed strongly in their physiological responses to heating, cooling and freezing; a finding in agreement with Chown *et al.* [48], who suggest that the form of physiological plasticity can be a key difference between invasive and native species. However, contrary to our expectations, *S. lateralis* generally outperformed *T. v. verticalis*, and appeared to possess a broader thermal tolerance range (*sensu* [24]). Both temperature and conductivity influenced corixid thermal tolerance. However, the effect of exposure to different temperatures and conductivities varied between upper and lower limits for the two species examined.

Although the temperatures recorded for  $CT_{min}$  and SCP are below those encountered by corixids under field conditions in our study area, their relative values and plasticities allow us to compare the relative ability of *Trichocorixa* and *Sigara* to cope with cold. The

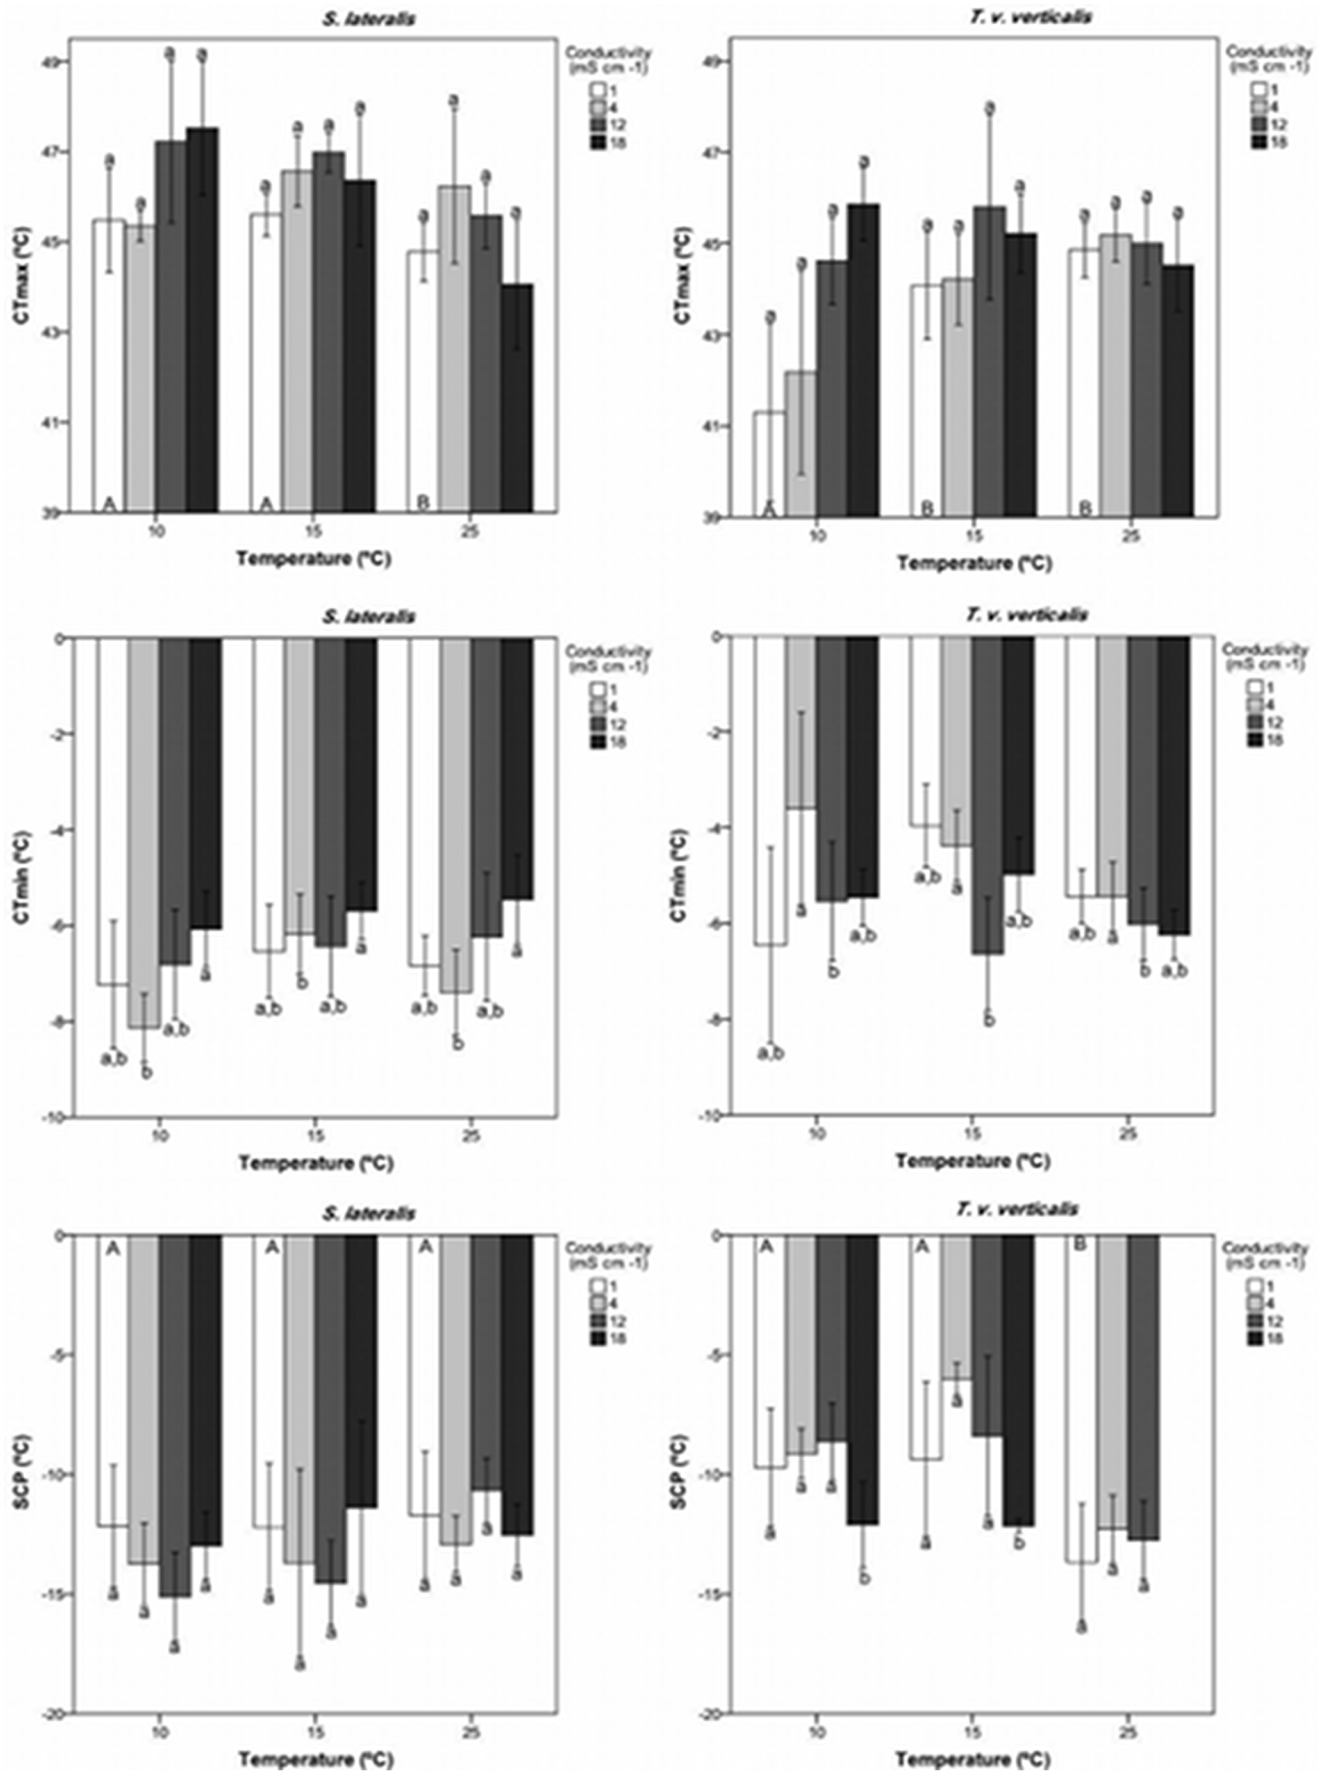

**Figure 1. Thermal limits and freezing point of *T. v. verticalis* and *S. lateralis*.** Histograms of mean ± SE critical thermal maximum (CT<sub>max</sub>), critical thermal minimum (CT<sub>min</sub>) and supercooling points (SCP) of *Sigara lateralis* and *Trichorixa verticalis verticalis* acclimated to different temperatures (10, 15 and 25°C) and conductivities (1, 4, 12, 18 mS cm<sup>-1</sup>). Significantly different means within species (*P*<0.05) measured at different acclimation temperatures are indicated by different capital letters inside the histograms, whereas significantly different means measured at different conductivities within the same temperature treatment are indicated by different lower case letters above or below the histograms (according to Estimated Marginal Means tests with Bonferroni correction). doi:10.1371/journal.pone.0063105.g001

minimum air temperature recorded at the Palacio de Doñana in 2012 was -6°C and this matches the minimum value ever recorded in Doñana (February 1981; 2012), although temperatures below zero are not so unusual (<http://www-rbd.ebd.csic.es/Seguimiento/mediosfisco.htm>). The CT<sub>max</sub> values we recorded are ecologically very relevant, however, since the maximum air temperature often reaches 46°C in July–August. Corixids concentrate in shallow water whose temperature can exceed that of the air in summer. For example, in ponds frequented by the study species, water temperature reached 39°C in May 2007 (authors' unpublished data), whilst air temperature in the same month did not exceed 34°C.

**Critical thermal maximum**

In terms of heat tolerance, the present study demonstrates that both species increase their CT<sub>max</sub> in response to acclimation to a combination of high conductivity (18 mS cm<sup>-1</sup>) and low temperature (10°C). Such an effect was also recorded by Verween *et al.* [49], who found a trade-off between suboptimal temperature tolerance and high salinity in *Mytilopsis leucophaeata* (Mollusca, Bivalvia). Contrary to our initial expectations, acclimation to higher temperatures (25°C) did not improve heat tolerance in either corixid species. From our findings it appears that both species possess a similar heat shock response at the higher temperature employed.

Insects express heat shock proteins (HSPs) in response to both cold and osmotic shock [50,51]. In *Drosophila*, exposure to low temperature results in heat shock protein upregulation when the animals are returned to higher temperatures [52], suggesting that the interaction between low temperature exposure and acute heating can also increase heat resistance [53]. Both processes may operate in the corixids in our study, suggesting that although HSP expression can vary among and within species [50], they appear to exhibit similar capacities to regulate HSP production under laboratory conditions. Such a plastic thermotolerance response has already been reported in many organisms [54] and here suggests

that both corixids may use similar physiological mechanisms of acclimation when exposed to low temperatures and high salinity. On the other hand, the fact that both species did not elevate their heat tolerance after exposure to the higher temperature suggests that both species may maintain a high standing stock of HSPs in their cells. This mechanism often occurs in warm adapted organisms [54], and suggests that new warmer conditions experienced in SW Spain by *T. v. verticalis* compared to its native range may have led to some physiological changes as an adaptation to the local conditions.

From our data, *S. lateralis* appears to be generally more heat tolerant than *T. v. verticalis*. It is possible that the differences in maximum heat tolerance observed in the present study are at least partly based on differences in body size between the two species. Body size-mediated thermal acclimatory responses of upper thermal limit have previously been reported for diving beetles [30] and freshwater Crustacea [55], and could explain why the larger species *S. lateralis* showed a higher heat tolerance than *T. v. verticalis* here.

In general, warm adapted ectotherms possess great tolerance to heat [56,57], but according to Stillman [56] they may have evolved this ability at the expense of their acclimatory capacity. Our results are in general agreement with Stillman's conclusion, since *S. lateralis* has a lower ability to acclimate CT<sub>max</sub> in response to prior temperature exposure than *T. v. verticalis* (note how the alien shows greater magnitude of change in mean CT<sub>max</sub> with temperature in Table S1), despite having the highest absolute CT<sub>max</sub> overall. The fact that *Trichorixa* apparently has greater plasticity to heat than *S. lateralis* may make it better able to respond to sudden temperature shifts in nature, something which may favour its spread.

**Critical thermal minimum**

Whilst the native *S. lateralis* generally entered chill coma at lower temperatures, the response to acclimation conductivity was species specific. Whereas *S. lateralis* increased CT<sub>min</sub> at lower conductivities, the opposite occurred for *T. v. verticalis*. Several previous studies have found effects of salinity on cold tolerance in other ectotherms, including *Nebrioporus* diving beetles, and fishes including the blackchin tilapia (*Sarotherodon melanotheron*) and the red drum (*Sciaenops ocellatus*) ([30,58], but see [59]). Doñana and

**Table 2.** Effect of acclimation temperature (T), acclimation conductivity (C), species (Sp: *Trichorixa verticalis verticalis* or *Sigara lateralis*) and sex on corixid critical thermal maximum (CT<sub>max</sub>) – General linear model.

| Source | SS   | d.f | MS   | F     | P      |
|--------|------|-----|------|-------|--------|
| T      | 10.3 | 2   | 5.1  | 2.92  | 0.058  |
| C      | 37.2 | 3   | 12.4 | 7.03  | <0.001 |
| Sp     | 51.8 | 1   | 51.8 | 29.37 | <0.001 |
| Sex    | 8.5  | 1   | 8.5  | 4.85  | 0.030  |
| T×C    | 59.2 | 6   | 9.8  | 5.60  | <0.001 |
| T×Sp   | 32.7 | 2   | 16.3 | 9.28  | <0.001 |
| C×Sp   | 3.7  | 3   | 1.2  | 0.71  | 0.545  |

Sum of squares (SS); degrees of freedom (d.f.); mean square (MS), F-ratio (F), probability level (P).

doi:10.1371/journal.pone.0063105.t002

**Table 3.** Effects of acclimation temperature (T), acclimation conductivity (C) and weight (W) on the critical thermal maximum (CTmax) of *Sigara lateralis*– General linear model.

| Source | SS   | d.f | MS   | F     | P     |
|--------|------|-----|------|-------|-------|
| T      | 6.4  | 2   | 3.2  | 2.43  | 0.098 |
| C      | 17.1 | 3   | 5.7  | 4.34  | 0.009 |
| W      | 18.2 | 1   | 18.2 | 13.88 | 0.001 |
| T×C    | 11.7 | 6   | 1.9  | 1.40  | 0.206 |

Sum of squares (SS); degrees of freedom (d.f.); mean square (MS), F-ratio (F), probability level (P).

doi:10.1371/journal.pone.0063105.t003



**Table 4.** Effect of acclimation temperature (T), acclimation conductivity (C) and species (Sp: *Trichocorixa verticalis* or *Sigara lateralis*) on corixid critical thermal minimum (CT<sub>min</sub>) – General linear model.

| Source | SS   | d.f | MS   | F     | P      |
|--------|------|-----|------|-------|--------|
| T      | 8.0  | 2   | 4.0  | 2.78  | 0.067  |
| C      | 6.7  | 3   | 2.2  | 1.54  | 0.208  |
| Sp     | 46.3 | 1   | 46.3 | 32.03 | <0.001 |
| T×C    | 13.8 | 6   | 2.3  | 1.59  | 0.158  |
| T×Sp   | 6.1  | 2   | 3.0  | 2.11  | 0.126  |
| C×Sp   | 31.5 | 3   | 10.5 | 7.27  | <0.001 |

Sum of squares (SS); degrees of freedom (d.f.); mean square (MS), F-ratio (F), probability level (P).

doi:10.1371/journal.pone.0063105.t004

surrounding areas such as the Odiel marshes are characterized by a Mediterranean subhumid climate with rainfall between late September and early April, hot and dry summers, and mild winters [60]. Salinity varies spatially and temporally, but many ponds and marshes in Doñana are oligohaline during the winter [60]. Given that *S. lateralis* overwinters as adults, our results suggest that its ability to better remain active at lower conductivities may reflect the ability to minimize energetic costs for osmoregulation during the winter season. However, such an adaptation for winter survival could bring a high cost for *S. lateralis* in terms of development, fecundity and longevity [50].

Cold hardiness and desiccation resistance are mechanistically linked, and one is thought to originally have developed from the other [61]. Amongst *Drosophila* species, widespread species possess higher levels of resistance to both desiccation and cold [62]. Furthermore, this lack of genetic limitation in resistance traits appears to help drive *Drosophila* distribution patterns. Thus, it is plausible that *T. v. verticalis* possesses such desiccation-inducible genes that are also induced by the desiccating effect of increases in ambient salinity. In response to osmotic stress at higher conductivities, these genes produce solutes that enhance cold tolerance [63]. In its native habitats, *T. v. verticalis* is considered to be a euryhaline insect [64] and often occurs in brackish and saline waters [14]. As with *S. lateralis*, *T. v. verticalis* overwinters as adults, but contrary to the native species, seems well adapted to overwinter in higher salinity waterbodies, like estuarine fish ponds [14,36]. In this context, our results suggest that the osmoregulatory ability of *T. v. verticalis* may allow this alien to spend the cold season in saline wetlands, where it probably also achieves continuous reproduction and development. This would help explain its successful colonization of Doñana, especially its dominance in permanent, saline fish ponds [14,15].

We detected no effect of temperature of acclimation on CT<sub>min</sub>, contrary to many previous studies on insects (e.g. [65,66,30]). This absence of acclimatory ability shows limited temperature-dependent phenotypic plasticity for CT<sub>min</sub> in our study species. Freezing winter temperatures are unusual in wetlands of southern Iberia, and these populations may not need well developed acclimatory abilities, which are known to have costs related to the severity of the stress [67]. In contrast, much colder winter temperatures are observed in the native range of *T. v. verticalis* along the east coast of North America (www.worldclim.org), and it would be interesting to compare native and invasive populations in this regard.

**Table 5.** Effect of acclimation temperature (T), acclimation conductivity (C) and species (Sp: *Trichocorixa verticalis* or *Sigara lateralis*) on corixid supercooling point (SCP) – General linear model.

| Source | SS    | d.f | MS   | F     | P      |
|--------|-------|-----|------|-------|--------|
| T      | 76.0  | 2   | 38.0 | 6.29  | 0.003  |
| C      | 51.9  | 3   | 17.3 | 2.86  | 0.041  |
| Sp     | 77.3  | 1   | 77.3 | 12.81 | 0.001  |
| T×C    | 32.8  | 6   | 5.4  | 0.90  | 0.495  |
| T×Sp   | 190.6 | 2   | 95.3 | 15.78 | <0.001 |
| C×Sp   | 134.5 | 3   | 44.8 | 7.42  | <0.001 |

Sum of squares (SS); degrees of freedom (d.f.); mean square (MS), F-ratio (F), probability level (P).

doi:10.1371/journal.pone.0063105.t005

### Supercooling point

Both corixid species are freeze-avoiding insects, as they both show pre-freeze mortality and the SCP represents their lower lethal limit to survival. Moreover, a decrease in SCP is likely to be part of their seasonal cold-hardening strategy [68]. Different factors contribute to the enhancement of SCP capacity in insects, especially body size [69]. However, we didn't find an effect of intraspecific size variation in our study.

In the case of *T. v. verticalis*, cold hardiness was higher after acclimation to both higher temperatures and conductivities. This may result from physiological adjustments that probably involve heat protectant accumulation in response to high temperature and water loss regulation in response to osmoregulatory stress. As temperature increases, *T. v. verticalis* increase its heat tolerance, perhaps by HSP upregulation. The ability of HSPs to improve both heat and cold stress has been well documented in *Drosophila* species ([53], for reviews see [50]), as has the influence of dehydration on insects' cold hardiness [42].

Since we did not observe any influence of either acclimation temperature or salinity on SCP in *S. lateralis*, it is possible that the native and exotic species differ fundamentally in their physiological ability to supercool. This lack of acclimatory ability of SCP in *S. lateralis* suggests that *T. v. verticalis* may in fact be better able to survive temperature and salinity fluctuations, despite the fact that it generally exhibited higher CT<sub>min</sub> and SCPs than *S. lateralis*.

### Implications for the invasion of *T. v. verticalis*

Overall, we found the native *S. lateralis* to be more thermally tolerant than the invasive *T. v. verticalis*, and our results may explain why *S. lateralis* remains dominant in freshwater ponds in the Doñana area, where *T. v. verticalis* is rare and has not been confirmed as a breeding species [14]. However, our study supports the hypothesis that an ability to cope with environmental fluctuations, and a high resistance to salinity, favours the invasion of *T. v. verticalis* in the Mediterranean region. The tolerance of *T. v. verticalis* to both heat and freezing increases following exposure to high conductivities. The mean salinity of remaining natural wetlands in the Mediterranean basin is much higher than in northern Europe [70,21], partly because freshwater wetlands have been drained more extensively [19]. Under a scenario of further climatic warming, greater evapotranspiration rates are likely to promote further increases in salinity [21], and as a consequence, species able to cope with higher salinities may benefit from ongoing global change. The ability of *T. v. verticalis* to survive and reproduce in waters of relatively high conductivity during winter

may be central to its success. The regular droughts occurring in the Mediterranean region mean that some winters see so little rain that many freshwater marshes do not flood, and in regions such as Doñana, this leaves water only in brackish fish ponds or coastal salt-pans which are now dominated by *T. v. verticalis* [71]. Our results suggest that *T. v. verticalis* has higher cold tolerance than *S. lateralis* in such habitats, a factor which is likely to contribute to its overwinter survival and reproduction. Saline waters may act as sources of the invasive *T. v. verticalis* for the surrounding freshwater habitats in Doñana and elsewhere, and its broad salinity tolerance and ongoing salinization of aquatic habitats may play important roles during the invasion.

Plasticity is a recognized characteristic of good invaders [72,73] and the thermal physiology of *T. v. verticalis* is consistent with this pattern. The greater range of mean responses recorded across our 12 experimental treatments in *T. v. verticalis* compared to *S. lateralis* (4.56 vs 3.46°C for  $CT_{max}$ ; 3.04 vs 2.68°C for  $CT_{min}$ ; 7.65 vs 3.89°C for SCP) all point to greater plasticity in the invader. In addition to its physiological abilities, life history characteristics may play a central role in the invasion success of *T. v. verticalis*. According to Sol *et al.* [74], successful invaders can face the ecological pressure posed by the newly invaded environment by allocating reproductive efforts over several breeding events. *T. v. verticalis* has multiple generations a year in permanent fish ponds in Doñana (authors unpublished data), whereas *S. lateralis* is bivoltine [31]. Whilst there are limited data on the life-history of native populations of *T. v. verticalis* in the Americas, it appears that the warmer climate of the Mediterranean area may have allowed this species to switch to reproducing throughout the year, as suggested in previous studies [15]. Such responses can occur rapidly following invasion. Japanese populations of the fall webworm (*Hyphantria cunea*, Lepidoptera) have shifted from being bivoltine to trivoltine in 25 years when exposed to new environmental conditions [75]. In *T. v. verticalis*, the ability to reproduce throughout the year, together with an apparently greater plasticity to heat, cold and salinity could facilitate its survival in the face of new environmental conditions, and indeed facilitate its spread as climate change proceeds.

Finally, whilst *T. v. verticalis* occurs in sympatry with the native *S. lateralis* in Spain [14], it also appears to overlap the salinity niche of some halophilic European corixids such as *S. selecta* (Fieber, 1848) and *S. stagnalis* (Leach, 1817) [36]. Future research should address possible interactions with these other species, since the outcomes of these encounters may not be identical

## Supporting Information

**Figure S1 Interactive effect of temperature and conductivity on mean  $CT_{max}$ .** Histograms are mean  $\pm$  SE critical thermal maximum ( $CT_{max}$ ) of *Sigara lateralis* and *Trichocorixa verticalis verticalis* acclimated to different temperatures (10, 15 and 25°C) and conductivities (1, 4, 12, 18 mS  $cm^{-1}$ ). Significantly different means ( $P < 0.05$ ) between different acclimation temperatures measured at the same acclimation conductivity are

## References

- Darwall W, Smith K, Allen D, Seddon M, McGregor Reid G, et al. (2008) Freshwater biodiversity – a hidden resource under threat. In: Vié JC, Hilton-Taylor C, Stuart SN editors. *Wildlife in a Changing World – An Analysis of the 2008 IUCN Red List of Threatened Species*: IUCN, Gland. pp. 43–53.
- Gibon FM (2000) Biologie de la conservation et singularité des cours d'eau. L'exemple des *Philopotamidae malgaches* (Insectes, Trichoptera). In: Lourenc WR Goodman SM editors. *Diversité et endémisme à Madagascar*: Société de Biogéographie, Paris. pp. 319–330.
- Dudgeon D (2003) The contribution of scientific information to the conservation and management of freshwater biodiversity in tropical Asia. *Hydrobiologia* 500: 295–314.
- Cohen AN (2002) Success factors in the establishment of human-dispersed organisms. In Bullock JM, Kenward RE, Hails RS, editors. *Dispersal Ecology*. Blackwell, London. pp 374–394.
- Gherardi F, Gollasch S, Minchin D, Olenin S, Panov VE (2009) *Alien Invertebrates and Fish in European Inland Waters*. Springer Netherlands. Vol. 3, pp. 81–92.

indicated by different capital letters inside the histograms, whereas significantly different means measured at different conductivities at the same acclimation temperature are indicated by different lower case letters above or below the histograms (according to Estimated Marginal Mean test with Bonferroni correction).

(TIF)

**Figure S2 Thermal limit and freezing point differences between *T. v. verticalis* and *S. lateralis*.** Histograms of mean  $\pm$  SE critical thermal maximum ( $CT_{max}$ ), critical thermal minimum ( $CT_{min}$ ) and supercooling points (SCP) of *Sigara lateralis* and *Trichocorixa verticalis verticalis* acclimated to different temperatures (10, 15 and 25°C) and conductivities (1, 4, 12, 18 mS  $cm^{-1}$ ), according to linear model output. Significantly different means between species ( $P < 0.05$ ) measured at different acclimation temperatures are indicated by different capital letters inside the histograms, whereas significantly different means between species measured at different conductivities are indicated by different lower case letters above or below the histograms (according to Estimated Marginal Mean test with Bonferroni correction).

(TIF)

**Table S1 Significantly different mean  $CT_{max}$  (Estimated Marginal Means tests with Bonferroni correction) from Table 2 according to acclimation temperature (T), acclimation conductivity (C), species (Sp: *Trichocorixa verticalis verticalis* or *Sigara lateralis*) and sex (1 = male; 2 = female).** These tests refer to partial effects from the final model.

(DOCX)

**Table S2 Significantly different mean  $CT_{min}$  (Estimated Marginal Means tests with Bonferroni correction) from Table 4 according to acclimation conductivity (C) and species (Sp: *Trichocorixa verticalis verticalis* or *Sigara lateralis*).** These tests refer to partial effects from the final model.

(DOCX)

**Table S3 Significantly different mean SCPs (Estimated Marginal Means tests with Bonferroni correction) from Table 5 according to acclimation temperature (T), acclimation conductivity (C) and species (Sp: *Trichocorixa verticalis verticalis* or *Sigara lateralis*).** These tests refer to partial effects from the final model.

(DOCX)

## Acknowledgments

We are grateful to Raquel Lopez, Cristina Ramo and Nico Varo for assistance in the field.

## Author Contributions

Conceived and designed the experiments: CC PC DB. Performed the experiments: CC. Analyzed the data: CC PC LB AG DB. Contributed reagents/materials/analysis tools: PC DB. Wrote the paper: CC PC LB AG DB.



6. Gherardi F (2006) Crayfish invading Europe: the case study of *Procambarus clarkii*. *Mar Freshw Behav Physiol* 39(3): 175–191.
7. Higgins SN, Zanden MJV (2010) What a difference a species makes: a meta-analysis of dreissenid mussel impacts on freshwater ecosystems. *Ecol Monogr* 80(2): 179–196.
8. Bailan EV, Segers H, Lévêque C, Martens K (2008) An introduction to the Freshwater Animal Diversity Assessment (FADA) project. *Hydrobiologia* 595: 3–8. 4.
9. Kment P (2006) A contribution to the faunistics of aquatic and semiaquatic Bugs (Heteroptera: Nepomorpha, Gerromorpha) in Portugal, with the review of biology of the Nearctic corixid *Trichorixa verticalis* (Fieber, 1851). *Bol SEA* 38: 359–361.
10. Jansson A, Reavell PE (1999) North American species of *Trichorixa* (Heteroptera: Corixidae) introduced into Africa. *Afr Entomol* 7(2): 295–297.
11. L'Mohdi O, Bennis N, Himmi O, Hajji K, El Haissoufi M, et al. (2010) *Trichorixa verticalis verticalis* (Fieber, 1851) (Hémiptère, Corixidae): une nouvelle espèce exotique au Maroc. *Bol SEA*, 46: 395–400.
12. Rabitsch W (2008) Alien True Bugs of Europe (Insecta: Hemiptera: Heteroptera). *Zootaxa* 1827: 1–44.
13. Sala J, Boix D (2005) Presence of the nearctic water boatman *Trichorixa verticalis verticalis* (Fieber, 1851) (Heteroptera, Corixidae) in the Algarve region (S Portugal). *Graellsia* 61(1): 31–36.
14. Rodríguez-Pérez H, Florencio M, Gómez-Rodríguez C, Green AJ, Diaz-Paniagua C, et al. (2009) Monitoring the invasion of the aquatic bug *Trichorixa verticalis verticalis* (Hemiptera: Corixidae) in the wetlands of Doñana National Park (SW Spain). *Hydrobiologia* 634: 209–217.
15. Van De Meutter F, Trekels H, Green AJ, Stoks R (2010a) Is salinity tolerance the key to success for the invasive water bug *Trichorixa verticalis*? *Hydrobiologia* 649: 231–238.
16. Guareschi S, Coccia C, Sánchez-Fernández D, Carbonell JA, Velasco J, et al. (2013) How far could the alien boatman *Trichorixa verticalis verticalis* spread? Worldwide estimation of its current and future potential distribution. *PLoS One* 8(3): e59757.
17. Kelts LJ (1979) Ecology of a tidal marsh corixid, *Trichorixa verticalis* (Insecta, Hemiptera). *Hydrobiologia* 64: 37–57.
18. Günter G, Christmas JY (1959) Corixids insects as part of the offshore fauna of the sea. *Ecology* 40: 724–725.
19. Green AJ, El Hamzaoui M, El Agbani MA, Franchimont J (2002) The conservation status of Moroccan waterbirds with particular reference to waterbirds and to changes since 1978. *Biol Conserv* 104: 71–82.
20. Sousa A, Sahin S, García-Murillo P, Morales J, García-Barrón L (2010) Wetland place names as indicators of manifestations of recent climate change in SW Spain (Doñana Natural Park). *Clim Change* 100: 525–557.
21. Moss B, Hering D, Green AJ, Aidoud A, Becares E, et al. (2009) Climate change and the future of freshwater biodiversity in Europe: a primer for policy-makers. *Freshw Rev* 2(2): 103–130.
22. Calosi P, Bilton DT, Spicer JI (2008a) Thermal tolerance, acclimatory capacity and vulnerability to global climate change. *Biol Lett* 4: 99–102.
23. Calosi P, Bilton DT, Spicer JI, Atfield A (2008b) Thermal tolerance and geographic range size in the *Agabus brunneus* group of European diving beetles (Coleoptera: Dytiscidae). *J Biogeogr* 35: 295–305.
24. Calosi P, Bilton DT, Spicer JI, Votier SC, Atfield A (2010) What determines a species' geographical range? Thermal biology and latitudinal range size relationships in European diving beetles (Coleoptera: Dytiscidae). *J Anim Ecol* 79(1): 194–204.
25. Bozinovic F, Calosi P, Spicer J (2011) Physiological correlates of geographic range in animals. *Annu Rev Ecol Evol Syst* 42: 155–79.
26. Kearney M, Shine R, Porter WP (2009) The potential for behavioral thermoregulation to buffer “cold-blooded” animals against climate warming. *Proc Natl Acad Sci U S A* 106 (10): 3835–3840.
27. Tewksbury JJ, Huey RB, Deutsch CA (2008) Putting the heat on tropical animals. *Science* 320: 1296–1297.
28. Dick JTA, Platvoet D (1996) Intraquid predation and species exclusions in amphipods: the interaction of behaviour, physiology and environment. *Freshw Biol* 36: 375–383.
29. Cáceres CE (1998) Seasonal dynamics and interspecific competition in Oneida Lake *Daphnia*. *Oecologia* 115: 233–244.
30. Sánchez-Fernández D, Calosi P, Atfield A, Arribas P, Velasco, et al. (2010) Reduced salinities compromise the thermal tolerance of hypersaline specialist diving beetles. *Physiol Entomol* 35(3): 265–273.
31. Cianferoni F (2011) Notes on Gerromorpha, Nepomorpha and Leptopodomorpha from Sardinia (Hemiptera, Heteroptera). *Conservazione Habitat Invertebrati* 5: 255–268.
32. Huey RB, Crill WD, Kingsolver JG, Weber KE (1992) A method for rapid measurement of heat or cold resistance of small insects. *Funct Ecol* 6(4): 489–494.
33. Castañeda LE, Lardies MA, Bozinovic F (2005) Interpopulational variation in recovery time from chill coma along a geographic gradient: A study in the common woodlouse, *Porcellio laevis*. *J Insect Physiol* 51: 1346–1351.
34. Sinclair BJ, Sjørnsen H (2001) Cold tolerance of the Antarctic springtail *Gomphiocephalus hodgsoni* (Collembola, Hypogastruridae). *Antarct Sc* 13(3): 271–279.
35. Worland MR, Convey P (2001) Rapid cold hardening in Antarctic microarthropods. *Funct Ecol* 15: 515–524.
36. Van De Meutter F, Trekels H, Green AJ (2010b) The impact of the North American waterbug *Trichorixa verticalis* (Fieber) on aquatic macroinvertebrate communities in southern Europe. *Fund Appl Limnol* 177(4): 283–292.
37. ASTM (1980) Standard Practice for Conducting Acute Toxicity Tests with Fishes, Macroinvertebrates and Amphibians, E729-80. In *Annual Book of ASTM Standards* ASTM, Philadelphia, Pennsylvania. pp. 279–280.
38. Terblanche JS, Deere JA, Clusella-Trullas S, Janion C, Chown SL (2007) Critical thermal limits depend on methodological context. *Proc R Soc Lond B Biol Sci* 274: 2935–294.
39. Pörtner HO (2001) Climate change and temperature-dependent biogeography: oxygen limitation of thermal tolerance in animals. *Naturwissenschaften* 88: 137–146.
40. Rezende E, Tejado M, Santos M (2011) Estimating the adaptive potential of critical thermal limits: methodological problems and evolutionary implications. *Funct Ecol* 25: 111–121.
41. Gaston KJ, Chown SL (1999) Elevation and climatic tolerance: a test using dung beetles. *Oikos* 86: 584–590.
42. Salt RW (1961) Principle of insect cold-hardiness. *Annu Rev Entomol* 6: 55–74.
43. Wilson P (2003) Ice nucleation in nature: supercooling point (SCP) measurements and the role of heterogeneous nucleation. *Cryobiology* 46(1): 88–98.
44. Aarset AV, Torres JJ (1989) Cold resistance and metabolic responses to salinity variations in the Amphipod *Eusirus antarcticus* and the Krill *Euphausia superba*. *Polar Biol* 9: 491–497.
45. Worland MR, Leinaas HP, Chown SL (2006) Supercooling point frequency distributions in Collembola are affected by moulting. *Funct Ecol* 20(2): 323–329.
46. Sokal RR, Rohlf FJ (1995) *Biometry: The Principles and Practice of Statistics in Biological Research*. 3rd ed. W. H. Freeman, New York.
47. Underwood AJ (1997) *Experiments in Ecology: Their Logical Design and Interpretation using Analysis of Variance*. Cambridge University Press, U.K.
48. Chown SL, Slabber S, McGeoch ML, Janion C, Leinaas HP (2007) Phenotypic plasticity mediates climate change responses among invasive and indigenous arthropods. *Proc R Soc Lond B Biol Sci* 274: 2531–2537.
49. Verween A, Vincx M, Degraer S (2007) The effect of temperature and salinity on the survival of *Mytilopsis leucophaea* larvae (Mollusca, Bivalvia): The search for environmental limits. *J Exp Mar Bio Ecol* 348: 111–120.
50. Feder ME, Hofmann GE (1999) Heat-shock proteins, molecular chaperones, and the stress response: evolutionary and ecological physiology. *Annu Rev Physiol* 61: 243–82.
51. Benoit JB, Lopez-Martinez G, Phillips ZP, Patrick KR, Denlinger DL (2010) Heat shock proteins contribute to mosquito dehydration tolerance. *J Insect Physiol* 56: 151–156.
52. Chown SL, Marais E, Terblanche JS, Klook CJ, Lighton JRB, et al. (2007) Scaling of insect metabolic rate is inconsistent with the nutrient supply network model. *Funct Ecol* 2(2): 282–290.
53. Goto SG, Kimura MT (1998) Heat-and cold-shock responses and temperature adaptations in subtropical and temperate species of *Drosophila*. *J Insect Physiol* 44(12): 1233–1239.
54. Barua D, Downs CA, Heckathorn SA (2003) Variation in chloroplast small heat-shock protein function is a major determinant of variation in thermotolerance of photosynthetic electron transport among ecotypes of *Chenopodium album*. *Funct Plant Biol* 30: 1071–1079.
55. Mundahl ND, Benton MJ (1990) Aspects of the thermal ecology of the rusty crayfish *Orconectes rusticus* (Girard). *Oecologia* 82: 210–216.
56. Stillman JH (2003) Acclimation capacity underlies susceptibility to climate change. *Science* 301: 65.
57. Compton TJ, Rijkenberg JAM, Drent J, Piersma T (2007) Thermal tolerance ranges and climate variability: A comparison between bivalves from differing climates. *J Exp Mar Bio Ecol* 352: 200–211.
58. Stauffer JR Jr, Vann DK, Hocutt CH (1984) Effects of salinity on preferred and lethal temperatures of the blackchin tilapia, *Sarotherodon melanocheiron*. *J Am Water Resour Assoc* 20: 711–715.
59. Craig SR, Neill WH, Gatlin DM III (1995) Effects of dietary lipid and environmental salinity on growth, body composition, and cold tolerance of juvenile red drum (*Sciaenops ocellatus*). *Fish Physiol Biochem* 14(1): 49–61.
60. Serrano L, Reina M, Martín G, Reyes I, Arechederra A, et al. (2006). The aquatic systems of Doñana (SW Spain): watersheds and frontiers. *Limnetica* 25: 11–32.
61. Ring RA, Danks HV (1994) Desiccation and cryoprotection: overlapping adaptations. *Cryo Letters* 15: 181–190.
62. Kellermann V, Van Heerwaarden B, Sgrò CM, Hoffmann AA (2009) Fundamental evolutionary limits in ecological traits drive *Drosophila* species distributions. *Science* 325: 1244–1246.
63. Somme L (1999) The physiology of cold hardiness in terrestrial arthropods. *Eur J Entomol* 96: 1–10.
64. Hutchinson GE (1993) *The Zoobenthos*. John Wiley & Sons, New York. 944 pp.
65. Terblanche JS, Sinclair BJ, Klook CJ, McFarlane ML, Chown SL (2005) The effects of acclimation on thermal tolerance, desiccation resistance and metabolic rate in *Chironomus thalassius* (Coleoptera: Chrysomelidae). *J Insect Physiol* 51: 1013–1023.
66. Sisodia S, Singh BN (2010) Influence of developmental temperature on cold shock and chill coma recovery in *Drosophila ananassae*: Acclimation and latitudinal variations among Indian populations. *J Therm Biol* 35: 117–124.
67. Rako L, Hoffmann AA (2006) Complexity of the cold acclimation response in *Drosophila melanogaster*. *J Insect Physiol* 52: 94–104.

68. Lee RE (1991) Principles of insect low temperature tolerance. In Lee RE, Denlinger DL, editors. *Insects at Low Temperature*: Chapman & Hall, New York. pp. 17–46.
69. Hahn DA, Martin AR, Porter SD (2008) Body size, but not cooling rate, affects supercooling points in the red imported fire ant, *Solenopsis invicta*. *Environ Entomol* 37(5): 1074–1080.
70. Declerck S, Vandekerkhove J, Johansson L, Muylaert K, Conde-Porcuna JM, et al. (2005) Multi-group biodiversity in shallow lakes along gradients of phosphorus and water plant cover. *Ecology* 86: 1905–1915.
71. Kloskowski J, Nieoczym M, Polak M, Pitucha P (2010) Habitat selection by breeding waterbirds at ponds with size-structured fish populations. *Naturwissenschaften* 97 (7): 673–82.
72. Richards CL, Bossdorf O, Muth NZ, Gurevitch J, Pigliucci M (2006) Jack of all trades, master of some? On the role of phenotypic plasticity in plant invasions. *Ecol Lett* 9: 981–993.
73. Ghalambor CK, McKay JK, Carroll SP, Reznick DN (2007) Adaptive versus non-adaptive phenotypic plasticity and the potential for contemporary adaptation in new environments. *Funct Ecol* 21: 394–407.
74. Sol D, Maspons J, Vall-lloera M, Bartomeus I, García-Peña GE, et al. (2012). Unraveling the Life History of Successful Invaders. *Science* 37: 580–583.
75. Gomi T (2007) Seasonal adaptations of the fall webworm *Hyphantria cunea* (Drury) (Lepidoptera: Arctiidae) following its invasion of Japan. *Ecological Research* 22: 855–861.
